# Supplementary material for: Catechol-tetraethylenepentamine co-deposition modified cellulose filter paper for α-glucosidase immobilization and inhibitor screening from traditional Chinese medicine
Source: Royal Society of Chemistry journal article supplement (doi:10.1039/d3ay01835k), 2023-01-01
Supplement: d3ay01835k1.pdf [file d3ay01835k1.pdf]

## Supporting Information

### **Catechol-Tetraethylenepentamine Co-deposition Modified Cellulose Filter Paper for $\alpha$ -Glucosidase Immobilization and Inhibitor Screening from traditional Chinese medicine**

Guang-Zhen Wan<sup>a</sup>, Chun-Lin Zhang<sup>b\*</sup> and Juan Chen<sup>a\*</sup>

<sup>a</sup> School of Pharmacy, Lanzhou University, Lanzhou, 730000, China

<sup>b</sup> The First Hospital of Lanzhou University, Lanzhou 730000, China.

\* Corresponding author: Chun-Lin Zhang and Juan Chen

E-mail: [chenjuan@lzu.edu.cn](mailto:chenjuan@lzu.edu.cn) (J. Chen)

Tel: 86-931-8915685

Fax: 86-931-8915685

---

\*Correspondence authors: Juan Chen and Chun-Lin Zhang; Tel: 86-931-8915686; Fax: 86-931-8915686;

E-mail: [chenjuan@lzu.edu.cn](mailto:chenjuan@lzu.edu.cn) (J. Chen); [2869877954@qq.com](mailto:2869877954@qq.com) (C.L. Zhang)

Table S1.  $K_m$  values of immobilized  $\alpha$ -glucosidase by different carriers and methods.

| Carrier material                                                                 | Immobilized method       | $K_m$   | Reference |
|----------------------------------------------------------------------------------|--------------------------|---------|-----------|
| Multi-walled carbon nanotubes                                                    | Covalent binding         | 1.97 mM | [1]       |
| Poly(amphoteric) cryogel                                                         | Entrapment               | 1.37 mM | [2]       |
| $\text{Cu}_3(\text{PO}_4)_2 \cdot 3\text{H}_2\text{O}$ hybrid nanoflower         | Coordination interaction | 0.76 mM | [3]       |
| Cellulose filter paper                                                           | Electrostatic adsorption | 2.80 mM | [4]       |
| Polyamidoamine-coated $\text{Fe}_3\text{O}_4$ nanoparticles                      | Cross linking            | 1.00 mM | [5]       |
| Gold nanoparticles modified porous polymer capillary                             | Covalent binding         | 2.05 mM | [6]       |
| Catechol-Tetraethylenepentamine Co-deposition<br>Modified Cellulose Filter Paper | Covalent binding         | 2.00 mM | This work |

## References

- [1] X. Meng, H. Zong, Z. Zheng, J.P. Xing, Z.Q. Liu, F.R. Song, S. Liu. *Analytical and Bioanalytical Chemistry*, (2023) 415:2677–2692.
- [2] S.Demirci, N. Sahiner. *Chemical Engineering Research and Design*, (2022) 177:670-681.
- [3] M. Lu, H. Zhang, X. Wang, H. Jiang, G. Hu, F.Q. Yang. *Enzyme Microb. Tech.* (2021) 146:109776.
- [4] P. Li, X.H. Ma, L. Jin, J. Chen. *J. Chromatogr. B*, (2021) 1167:122582.
- [5] J. Jiang, Y. Yu, L. Wang, J. Li, J. Ling, Y. Li, G. Duan, *Talanta*, (2019) 195:127-136.
- [6] A. Zhang, F. Ye, J. Lu, S. Zhao. *Food Chem*, (2013) 141:1854-1859.
